# Supplementary material
Source: MDPI journal article supplement (https://www.mdpi.com/2073-4344/13/9/1303)
Supplement: s1 [file s1]

## Supplementary Materials

# Impacts of Ni-Loading Method on the Structure and the Catalytic Activity of NiO/SiO<sub>2</sub>-Al<sub>2</sub>O<sub>3</sub> for Ethylene Oligomerization

Katsuya Shimura <sup>1,\*</sup>, Shigehiro Yoshida <sup>2</sup>, Hiroshi Oikawa <sup>2</sup>, and Tadahiro Fujitani <sup>1</sup>

<sup>1</sup> Interdisciplinary Research Center for Catalytic Chemistry, National Institute of Advanced Industrial Science and Technology (AIST), 1-1-1 Higashi, Tsukuba 305-8565, Ibaraki, Japan; t-fujitani@aist.go.jp

<sup>2</sup> Innovative Research Excellence, Power Unit & Energy, Honda R & D Co., Ltd., 3-15-1 Sensui, Asaka 351-0024, Saitama, Japan; shigehiro\_yoshida@jp.honda (S.Y.); hiroshi\_oikawa@jp.honda (H.O.)

\* Correspondence: katsuya-shimura@aist.go.jp; Tel.: +81-82-493-6844

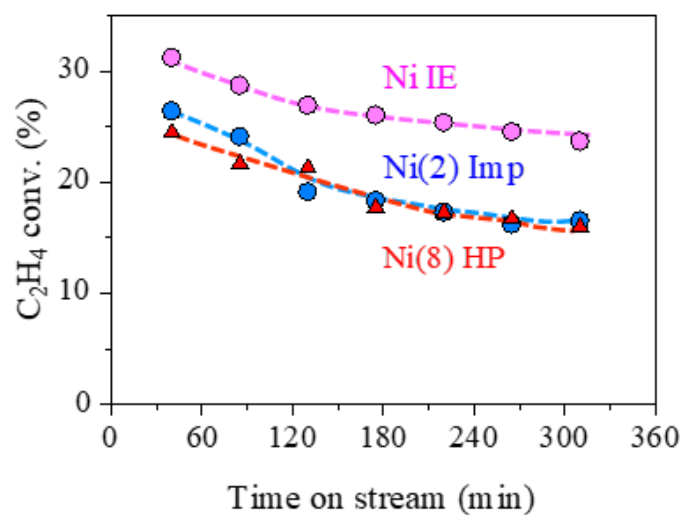

**Figure S1.** Time course of  $C_2H_4$  conversion over representative Ni/ASA catalysts prepared by an ion-exchange (Ni IE), impregnation (Ni(2) Imp), or one-step homogeneous precipitation (Ni(8) HP) method of Ni loading. Conditions: Catalyst: 0.2 g, temperature: 300 °C, pressure: 0.1 MPa,  $C_2H_4$ : 20 mL/min,  $N_2$ : 20 mL/min.

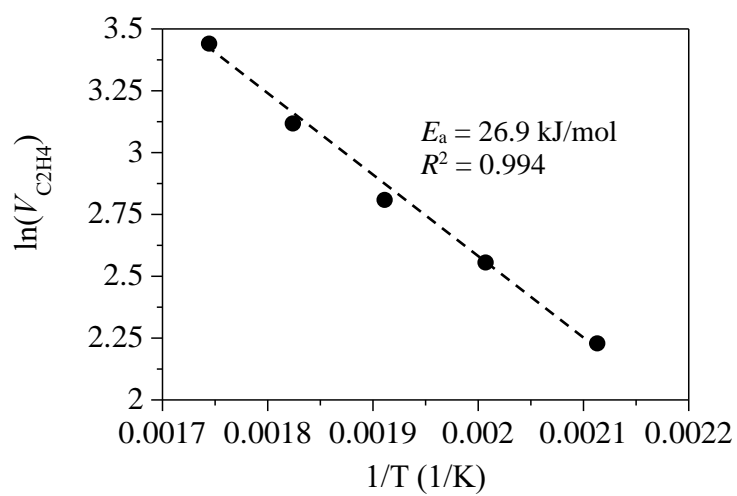

**Figure S2.** Arrhenius plots for conversion of  $\text{C}_2\text{H}_4$  over Ni/ASA catalyst prepared by an ion-exchange method of Ni loading (Ni(1.1) IE). Conditions: Catalyst: 0.2 g, temperature: 200–300 °C, pressure: 0.1 MPa,  $\text{C}_2\text{H}_4$ : 20 mL/min,  $\text{N}_2$ : 20 mL/min.

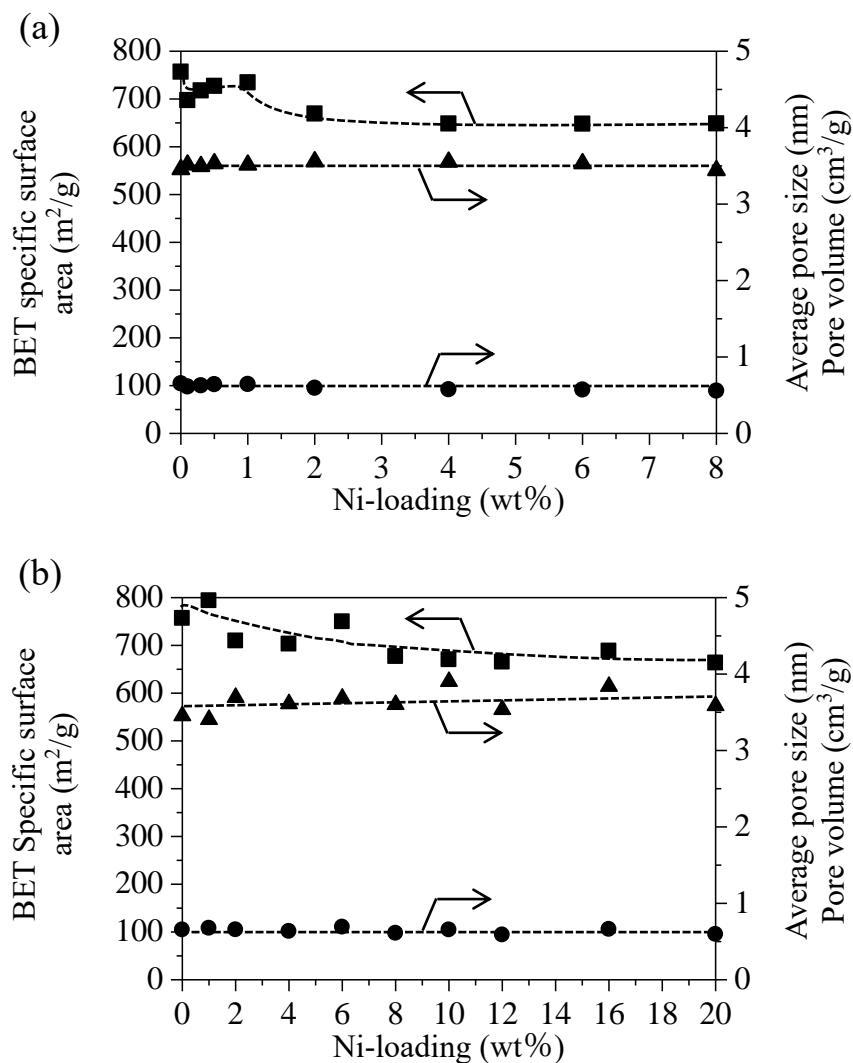

**Figure S3.** BET specific surface area (black squares), average pore size (black triangles), and pore volume (black circles) of Ni/ASA catalysts prepared by an (a) impregnation or (b) one-step homogeneous precipitation method of Ni loading.

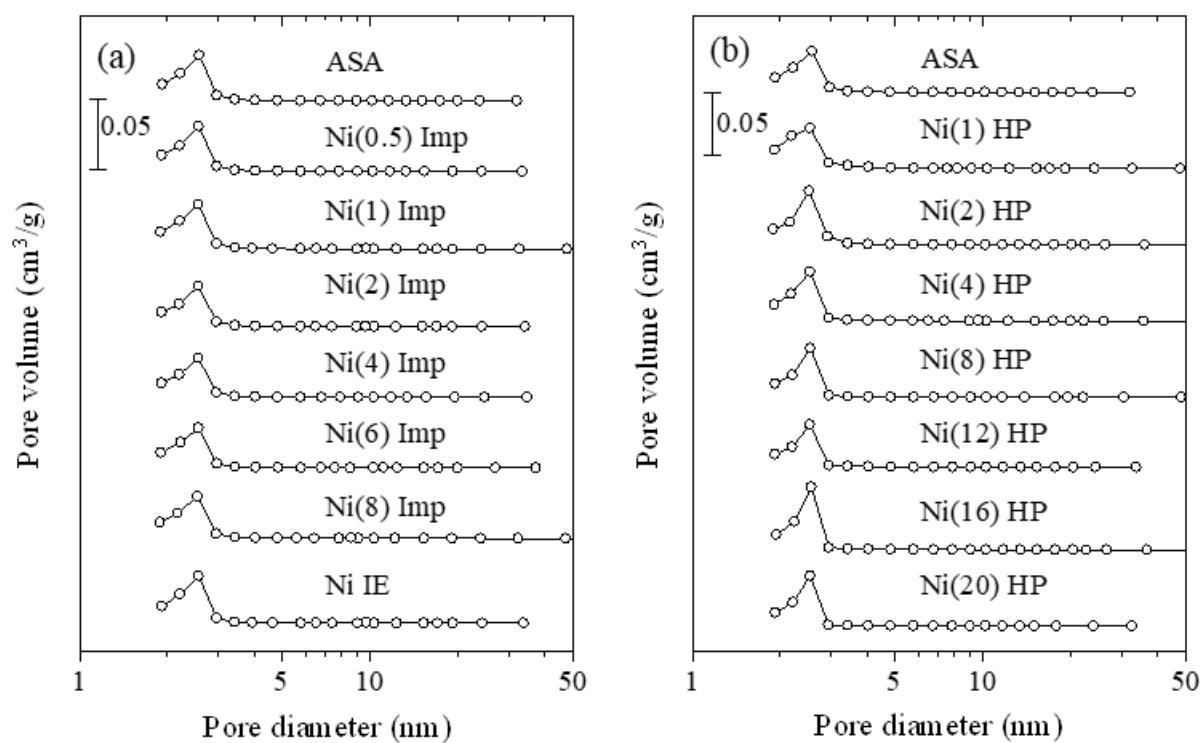

**Figure S4.** Pore size distribution of Ni/ASA catalysts prepared by an (a) impregnation (Imp) or ion-exchange (IE), or (b) one-step homogeneous precipitation (HP) method of Ni loading.

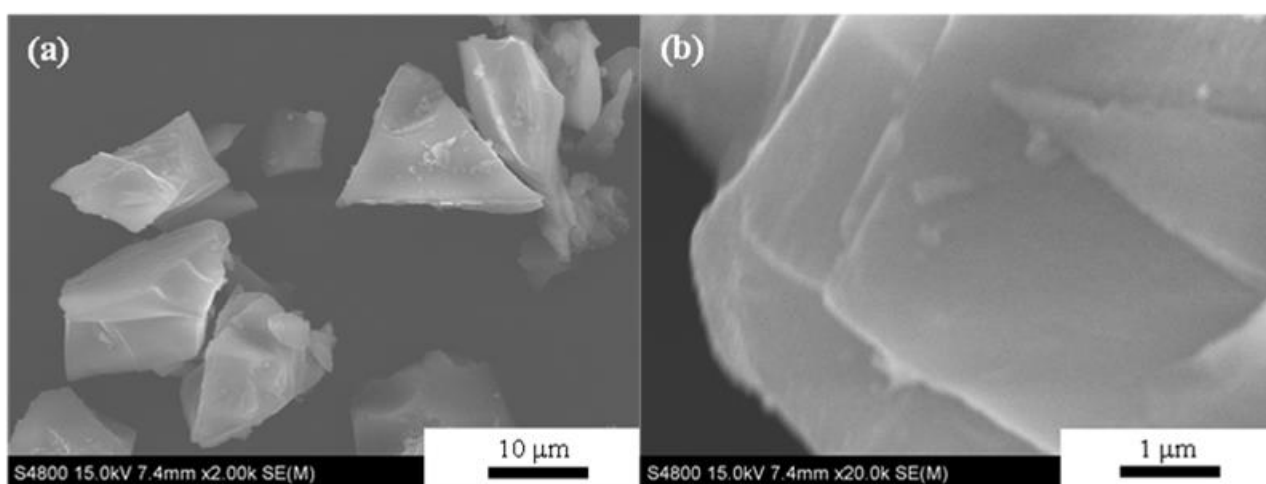

**Figure S5.** FE-SEM images of Ni/ASA catalyst prepared by an ion-exchange method of Ni loading (Ni(1.1) IE).

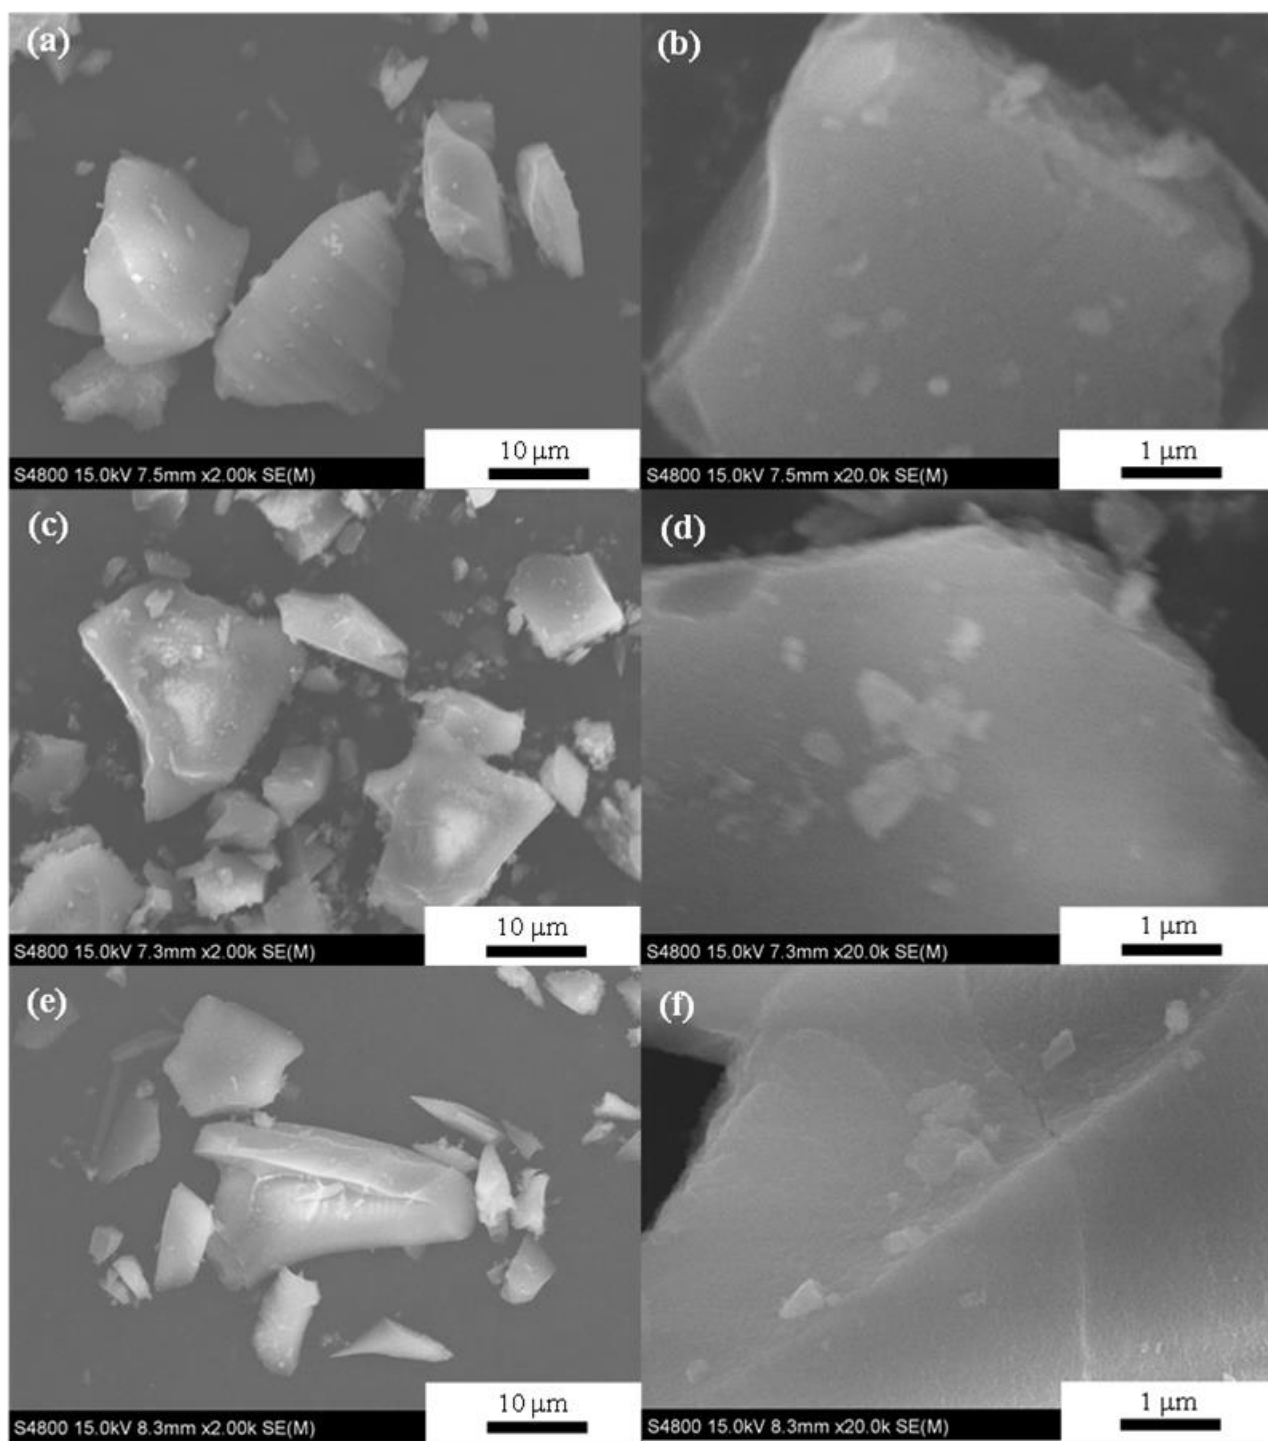

**Figure S6.** FE-SEM images of representative Ni/ASA catalysts prepared by a one-step homogeneous precipitation (HP) method of Ni loading: (a, b) Ni(1) HP, (c, d) Ni(8) HP, (e, f) Ni(16) HP.

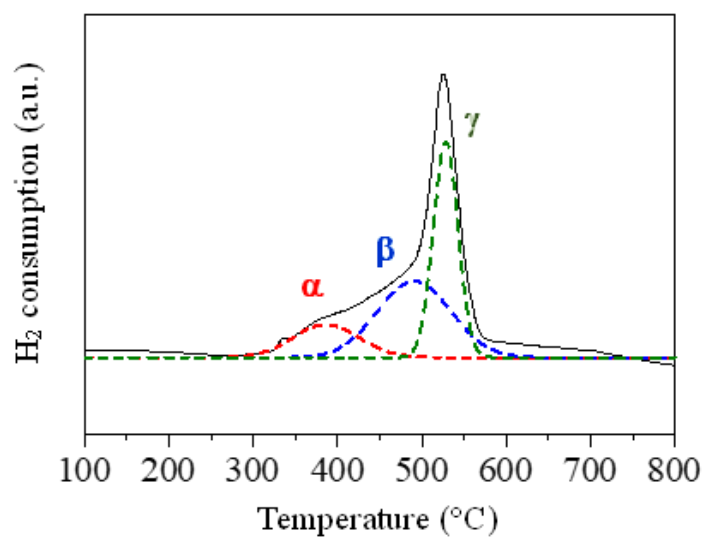

**Figure S7.** Peak deconvolution of the H<sub>2</sub>-TPR profile of a representative Ni/ASA catalyst prepared by an impregnation method of Ni loading: Ni(2) Imp. Solid and dotted lines represent the observed and deconvoluted profiles, respectively.  $\alpha$ : peak attributed to bulk-like NiO particles;  $\beta$ : peak attributed to small NiO particles;  $\gamma$ : peak attributed to ion-exchanged Ni cations.



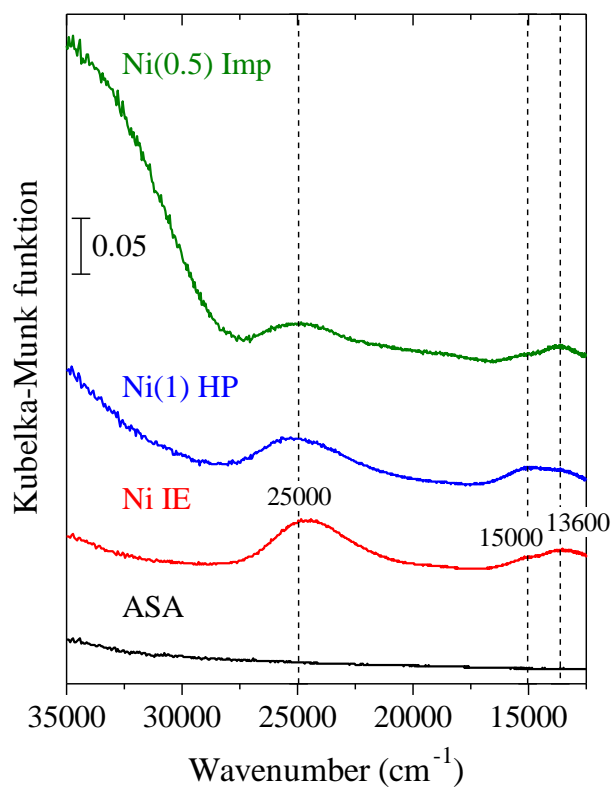

**Figure S8.** Diffuse reflectance UV-vis spectra of the ASA support and Ni/ASA catalysts prepared by an ion-exchange (Ni IE), impregnation (Ni(0.5) Imp), or one-step homogeneous precipitation (Ni(1) HP) method of Ni loading.

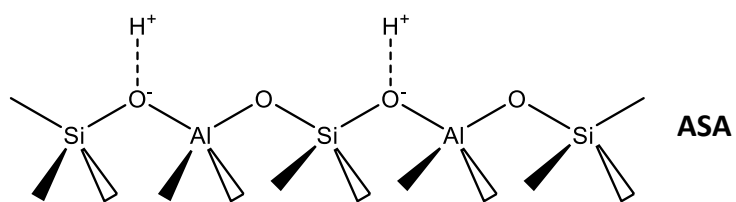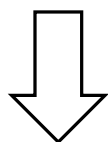

Ion-exchange with Ni(NO<sub>3</sub>)<sub>2</sub>  
aqueous solution

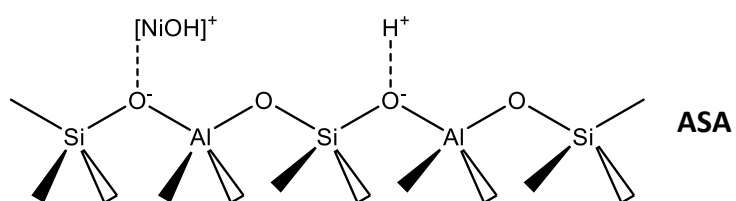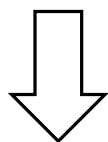

Calcination at 450 °C

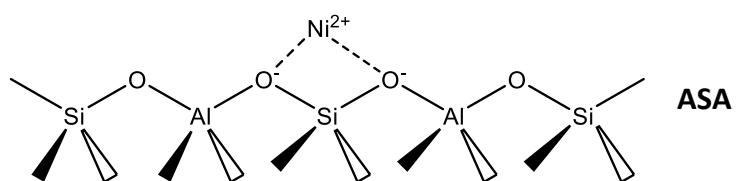

**Figure S9.** Proposed structure of ion-exchanged Ni cation in Ni/ASA catalyst.

**Table S1.** Comparison of catalytic activity of Ni-containing heterogeneous catalysts in EO

| Catalyst                                             | Ni<br>(wt%) | Ni-loading<br>method | Temperature<br>(°C) | Pressure<br>(MPa) | Activity <sup>a</sup><br>(g/g/h) | Activity<br>at 0.1 MPa <sup>b</sup><br>(g/g/h) | Ref.      |
|------------------------------------------------------|-------------|----------------------|---------------------|-------------------|----------------------------------|------------------------------------------------|-----------|
| Ni-Y                                                 | 5.6         | Impregnation         | 60                  | 2.8               | 0.3                              | 0.1                                            | 10        |
| Ni-Beta                                              | 2.5         | Ion-exchange         | 120                 | 2.6               | 1.6                              | 0.4                                            | 11        |
| Ni/Beta                                              | 5.2         | Impregnation         | 120                 | 0.1               | 0.2                              | 0.2                                            | 48        |
| Ni/Al-MCM-41                                         | 5.7         | Impregnation         | 120                 | 0.1               | 0.9                              | 0.9                                            | 48        |
| Ni-Al-SBA-15                                         | 2.6         | Ion-exchange         | 150                 | 3.0               | 9.1                              | 2.3                                            | 34        |
| Ni-AlSiO <sub>2</sub>                                | 2.0         | Ion-exchange         | 150                 | 3.0               | 9.0                              | 2.3                                            | 35        |
| Ni-SiO <sub>2</sub> -Al <sub>2</sub> O <sub>3</sub>  | 1.6         | Ion-exchange         | 110                 | 3.5               | 1.9                              | 0.5                                            | 58        |
| Ni-SiO <sub>2</sub> -Al <sub>2</sub> O <sub>3</sub>  | 0.27        | Ion-exchange         | 300                 | 1.2               | 3.7                              | 1.4                                            | 19        |
| NiO/SiO <sub>2</sub> -Al <sub>2</sub> O <sub>3</sub> | 4.0         | Impregnation         | 300                 | 0.1               | 1.6                              | 1.6                                            | 53        |
| NiO/SiO <sub>2</sub> -Al <sub>2</sub> O <sub>3</sub> | 4.0         | Impregnation         | 300                 | 0.1               | 1.8                              | 1.8                                            | 54        |
| Ni IE                                                | 1.1         | Ion-exchange         | 300                 | 0.1               | 2.3                              | 2.3                                            | This work |

<sup>a</sup> Data from references [1] and [57]. Complete units: (g of oligomers)/(g of catalyst)/h.

<sup>b</sup> Activity at 0.1 MPa was calculated assuming that the reaction rate for EO was 0.4th order with respect to pressure. Complete units: (g of oligomers)/(g of catalyst)/h.

**Table S2.** Activation energies of representative Ni/ASA catalysts

| Catalyst  | Activation energy |
|-----------|-------------------|
|           | (kJ/mol)          |
| Ni IE     | 26.9              |
| Ni(1) Imp | 29.3              |
| Ni(8) Imp | 21.2              |
| Ni(8) HP  | 24.5              |
| Ni(12) HP | 20.9              |

**Table S3** Crystallite size of NiO and NiSiO<sub>3</sub>, as measured by XRD

| Catalyst   | Crystallite size (nm) |                    |
|------------|-----------------------|--------------------|
|            | NiO                   | NiSiO <sub>3</sub> |
| Ni(1) Imp  | n.d.                  | n.d.               |
| Ni(2) Imp  | 11.4                  | n.d.               |
| Ni(4) Imp  | 11.6                  | n.d.               |
| Ni(6) Imp  | 9.2                   | n.d.               |
| Ni(8) Imp  | 9.9                   | n.d.               |
| Ni(1.1) IE | n.d.                  | n.d.               |
| Ni(1) HP   | n.d.                  | n.d.               |
| Ni(2) HP   | n.d.                  | n.d.               |
| Ni(4) HP   | n.d.                  | 7.8                |
| Ni(8) HP   | n.d.                  | 8.0                |
| Ni(12) HP  | n.d.                  | 5.3                |
| Ni(16) HP  | n.d.                  | 5.7                |
| Ni(20) HP  | n.d.                  | 5.5                |

n.d.: not detected. Crystallite sizes of NiO and NiSiO<sub>3</sub> were calculated from the diffraction lines at 43.2 and 60.7 degrees, respectively, using the Scherrer equation.

**Table S4.** Deconvolution of H<sub>2</sub>-TPR profiles of Ni/ASA catalysts prepared by an impregnation method

| Catalyst  | Ratio (%) |           |               | Amount (wt%) |           |               |
|-----------|-----------|-----------|---------------|--------------|-----------|---------------|
|           | Large NiO | Small NiO | Ion-exchanged | Large NiO    | Small NiO | Ion-exchanged |
|           | particles | particles | Ni cations    | particles    | particles | Ni cations    |
| Ni(1) Imp | 6.0       | 41.0      | 53.0          | 0.06         | 0.41      | 0.53          |
| Ni(2) Imp | 20.1      | 38.7      | 41.2          | 0.40         | 0.78      | 0.82          |
| Ni(4) Imp | 39.0      | 40.1      | 20.9          | 1.56         | 1.60      | 0.84          |
| Ni(6) Imp | 23.0      | 52.4      | 24.6          | 1.38         | 3.14      | 1.48          |
| Ni(8) Imp | 60.3      | 26.2      | 13.5          | 4.82         | 2.10      | 1.08          |

**Table S5.** Amounts of acidic sites in ASA and Ni/ASA, as calculated from NH<sub>3</sub>-TPD profiles

| Entry | Catalyst           | Amount of acidic sites (mmol/g) |                 |           | Total |
|-------|--------------------|---------------------------------|-----------------|-----------|-------|
|       |                    | Weak                            | Medium-strength | Strong    |       |
|       |                    | (<400 °C)                       | (400–600 °C)    | (>600 °C) |       |
| 1     | ASA                | 0.49                            | 0.14            | 0.50      | 1.13  |
| 2     | Ni(1.1) IE         | 0.62                            | 0.35            | 0.54      | 1.51  |
| 3     | Ni(1) Imp          | 0.61                            | 0.41            | 0.52      | 1.54  |
| 4     | Ni(2) Imp          | 0.67                            | 0.49            | 0.49      | 1.65  |
| 5     | Ni(4) Imp          | 0.63                            | 0.42            | 0.50      | 1.55  |
| 6     | Ni(6) Imp          | 0.63                            | 0.42            | 0.50      | 1.55  |
| 7     | Ni(8) Imp          | 0.62                            | 0.36            | 0.46      | 1.44  |
| 8     | Ni(1) HP           | 0.50                            | 0.22            | 0.56      | 1.28  |
| 9     | Ni(2) HP           | 0.49                            | 0.23            | 0.56      | 1.28  |
| 10    | Ni(4) HP           | 0.51                            | 0.26            | 0.67      | 1.44  |
| 11    | Ni(8) HP           | 0.56                            | 0.28            | 0.69      | 1.53  |
| 12    | Ni(12) HP          | 0.61                            | 0.32            | 0.85      | 1.78  |
| 13    | Ni(16) HP          | 0.70                            | 0.35            | 0.88      | 1.93  |
| 14    | Ni(20) HP          | 0.71                            | 0.40            | 1.08      | 2.19  |
| 15    | NiSiO <sub>3</sub> | 0.47                            | 0.55            | 1.33      | 2.35  |
